# Supplementary material for: Innovation in Radionuclide Therapy for the Treatment of Prostate Cancers: Radiochemical Perspective and Recent Therapeutic Practices
Source: MDPI journal article supplement (doi:10.3390/cancers15123133), 2023-06-10
Supplement: s1 [file s1]

**Supplementary Table S1:** Ongoing Phase 1 clinical trials with radionuclides for the treatment of PCas (source: clinicaltrials.gov ; last accession : Novembre 15<sup>th</sup> 2022). PCa: Prostate Cancer, mHSPC: metastatic hormone sensitive Prostate Cancer, mCRPC: metastatic-castration resistant Prostate Cancer, ADT: androgen deprivation therapy, ARDT: Androgen receptor directed therapy, EBRT: External beam radiation therapy, SBRT: Stereotactic Body Radiation Therapy, BCR: biochemical recurrence, cN+: clinical positive lymph node.

| NCT number  | Drug combined          | Name of Study  | Disease stage  | Intervention                                                                                                                                                               | Phase     | Location      |
|-------------|------------------------|----------------|----------------|----------------------------------------------------------------------------------------------------------------------------------------------------------------------------|-----------|---------------|
| NCT05079698 | SBRT                   | 21-158         | Oligo mHSPC    | <sup>177</sup> Lu-PSMA-617 + Stereotactic Body Radiotherapy                                                                                                                | Phase 1   | United States |
| NCT05162573 | EBRT                   | PROQUIRE-1     | cN+ PCa        | <sup>177</sup> Lu-PSMA-617 + EBRT                                                                                                                                          | Phase 1   | Netherlands   |
| NCT04071236 | Avelumab<br>Peposertib | NCI-2019-05620 | mCRPC          | [ <sup>223</sup> Ra]RaCl <sub>2</sub> <i>vs</i> [ <sup>223</sup> Ra]RaCl <sub>2</sub> + Peposertib <i>vs</i> [ <sup>223</sup> Ra]RaCl <sub>2</sub> + Peposertib + Avelumab | Phase 1/2 | United States |
| NCT04597411 |                        | AcTION         | mHSPC<br>mCRPC | [ <sup>225</sup> Ac]Ac-PSMA-617                                                                                                                                            | Phase 1   | South Africa  |
